# Supplementary material
Source: PubMed Central journal article supplement (PMC6358685)
Supplement: pnas.1810138116.sapp.pdf [file pnas.1810138116.sapp.pdf]

1 **Supplementary Information for**

2

3 **Niche adaptation limits bacteriophage predation of *Vibrio cholerae* in a nutrient-**  
4 **poor aquatic environment**

5

6 Cecilia A. Silva-Valenzuela, Andrew Camilli\*

7

8 \*Corresponding author

9 E-mail: [andrew.camilli@tufts.edu](mailto:andrew.camilli@tufts.edu)

10

11 **This PDF file includes**

12 Supplementary Materials and Methods

13 Figs. S1 to S6

14 Table S1

15 References for SI reference citations

16

17

18

19

20

21

22

23 Cecilia A. Silva-Valenzuela, Andrew Camilli

24 **SI Materials and Methods**

25 **Bacteriophage stock preparation**

26 For high-titer phage stocks, 40 ml cultures of *V. cholerae* HC1037 were grown to  
27 mid-exponential phase ( $OD_{600}$ :0.1-0.2) and inoculated with 5 fresh plaques from each  
28 phage. Infected cultures were incubated at 37°C with aeration for 1.5 hours. After this  
29 time, sodium citrate was added at a final concentration of 50 mM for 1 h to reduce  
30 further phage adsorption. After visualization of lysis, cultures were centrifuged to spin  
31 down debris and intact cells and the supernatant was filter-sterilized using a 0.22 µm  
32 filter (Millipore). A 0.2 volume of 5x phage precipitation buffer (20% Polyethylene glycol  
33 MW 8000, 2.5 M NaCl) was added and mixed by inversion. The solution was incubated  
34 at -80°C for 20 minutes and thawed at 4°C to precipitate phage. Finally, phage were  
35 concentrated by centrifugation at 4°C (10,000 RCF, 10 min), supernatant was removed  
36 and the pellet was resuspended in STM buffer (100 mM NaCl, 10 mM MgSO<sub>4</sub>, 10 mM  
37 Tris-HCl pH 7.5). Phage stocks were stored at 4°C until further use.

38

39 **Titering phage concentration by plaque assay**

40 Ten microliters of serially diluted phage was mixed with 100 µl of  $OD=0.1$  *V.*  
41 *cholerae* HC1037 and phages were allowed to adsorb for 10 min at 24°C. Each dilution  
42 was transferred to 24-well clear, untreated tissue culture plates (Corning) and 500 µl of  
43 molten 50°C 0.3% agarose in LB Miller broth was added and mixed by gentle swirling.  
44 Plates were incubated overnight at 37°C and plaques were counted.

45

46

Cecilia A. Silva-Valenzuela, Andrew Camilli

47 **Analysis of phage escape mutants**

48           After phage predation assays in either fresh water or 0.7% instant ocean, single  
49 *V. cholerae* cells that survived predation were colony purified on LB plates. Individual  
50 colonies were exposed to the corresponding phage by cross-streaking (1). Briefly, a 20  
51  $\mu$ l aliquot of phage at  $10^9$  PFU/ml was spotted onto the edge of an LB plate, and the  
52 plate was tipped at an angle to allow the dribble across the center line of the plate. After  
53 letting the liquid soak into the plate, individual colonies of *V. cholerae* were streaked  
54 across the line of phage, and the plate was incubated overnight at 37°C. Sensitivity to  
55 the phage was revealed by no or poor growth after going through the line of phage.

56           Resistant and sensitive mutants were grown overnight at 37°C with aeration.  
57 Genomic DNA was extracted using the DNeasy Blood & Tissue Kit (Qiagen). The  
58 extracted DNA was used to prepare whole-genome libraries using the Nextera XT DNA  
59 Library Preparation Kit (Illumina). Samples were sequenced as single-end 50-bp length  
60 on an Illumina HiSeq 2500. Resulting reads were compared to the reference genome  
61 for *V. cholerae* HC1037 using the CLC Genomics Workbench 8 software (Qiagen) and  
62 variant analyses were performed on mapped reads with a frequency threshold of 51%.

63

64

65

66

67

68

69

Cecilia A. Silva-Valenzuela, Andrew Camilli

70  
71  
72  
73  
74  
75  
76  
77  
78  
79  
80  
81  
82  
83  
84  
85  
86  
87  
88  
89  
90  
91  
92

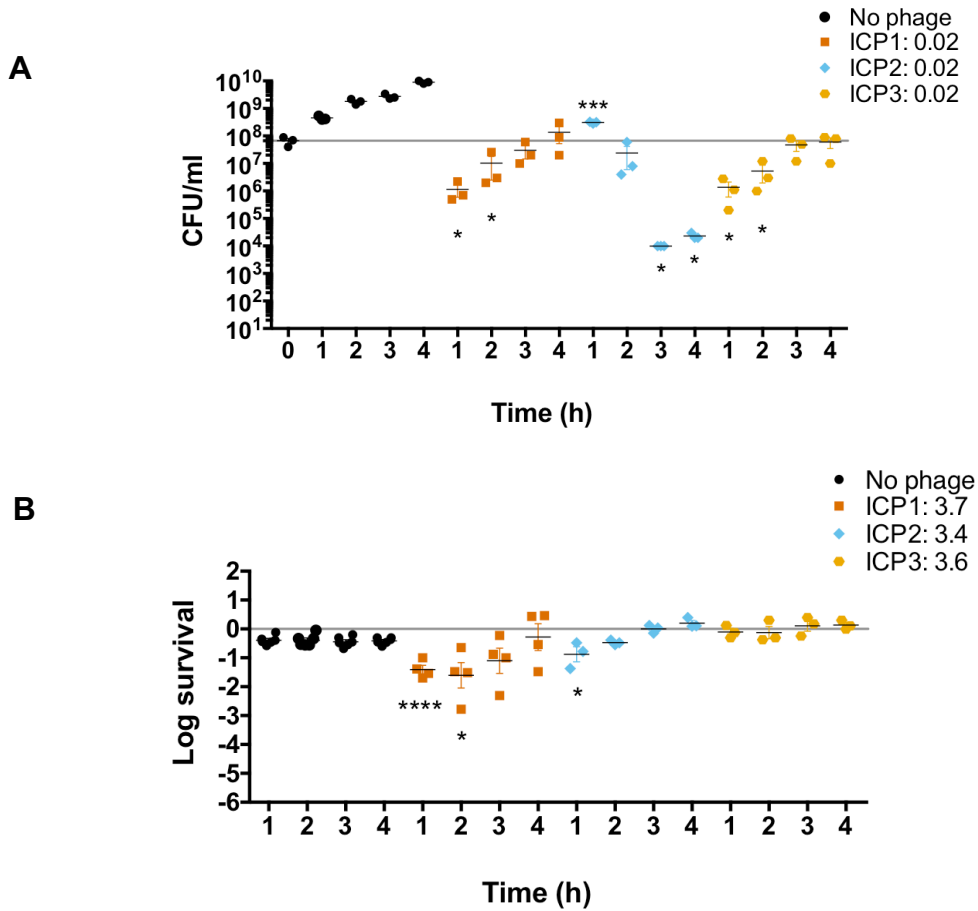

**Figure S1. ICP phage predation dynamics on rapidly growing and stationary phase bacteria.** (a)  $10^6$  CFU of *V. cholerae* from an overnight culture were inoculated into M9 minimal media in the absence of added carbon source. Then each ICP phage was added to an MOI > 3 to assess bacterial viability over time. Graph represents the average and standard deviation of at least three biological replicates. (b) Cultures were grown in LB broth at 30°C with aeration until they reached OD<sub>600</sub> of 0.1. Then, phages were added to an MOI of 0.01 to assess bacterial viability over time. Graph represents the average and standard error of at least three biological replicates. Grey line indicated bacterial concentration at time 0. (\*P < 0.05, \*\*\*P < 0.001, \*\*\*\*P < 0.0001).

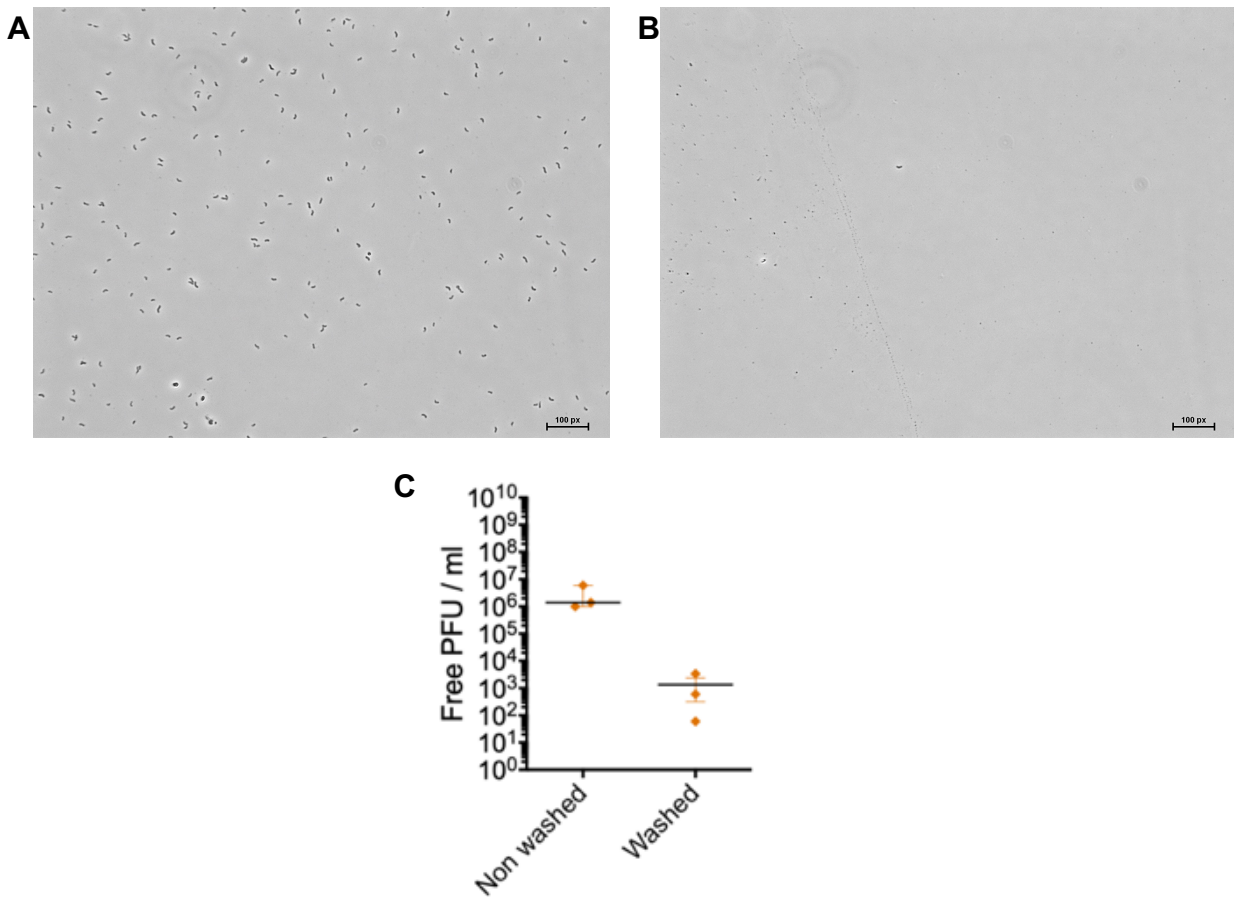

94

95

96 **Figure S2. ICP1 preys on *V. cholerae* in estuary water.** 107 CFU of *V. cholerae* from  
 97 an overnight culture were pre-adapted in 0.7% Instant Ocean overnight in the absence  
 98 of added carbon source. ICP1, ICP2 or ICP3 were added to an MOI of 0.01 to assess  
 99 bacterial viability and phage replication over time. Phase contrast microscopic images of  
 100 non-infected control cultures (a) and infected cultures (b) after 6h of ICP1 infection.

101 Scale bar represents 65  $\mu\text{m}$  (0.65  $\mu\text{m}/\text{px}$ ) (c) Free PFU titer after 6h of infection (Non-  
 102 washed). After washing the infected cells, samples were filtered using a 0.22  $\mu\text{m}$  filter to  
 103 test for free PFU. Graph shows median with range of three biological replicates.

104

Cecilia A. Silva-Valenzuela, Andrew Camilli

105

106

107

108

109

110

111

112

113

114

115

116

117

118

119

120

121

122

123

124

125

126

127

**A**

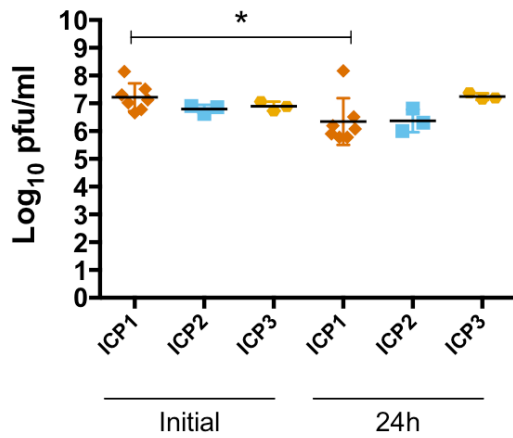

**B**

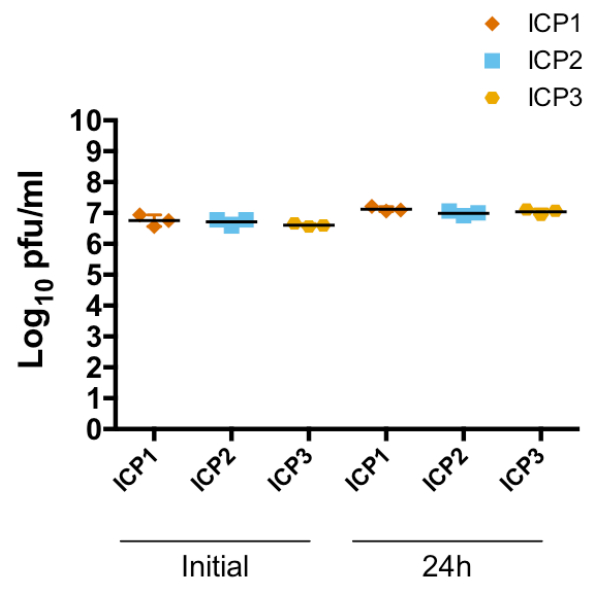

**Figure S3. Stability of ICP phages in estuary or fresh water.** 10<sup>7</sup> PFU of ICP1, ICP2 or ICP3 were added to (a) estuary or (b) fresh water in the absence of a bacterial host. PFU/ml were measured at 30°C with aeration after 24h.

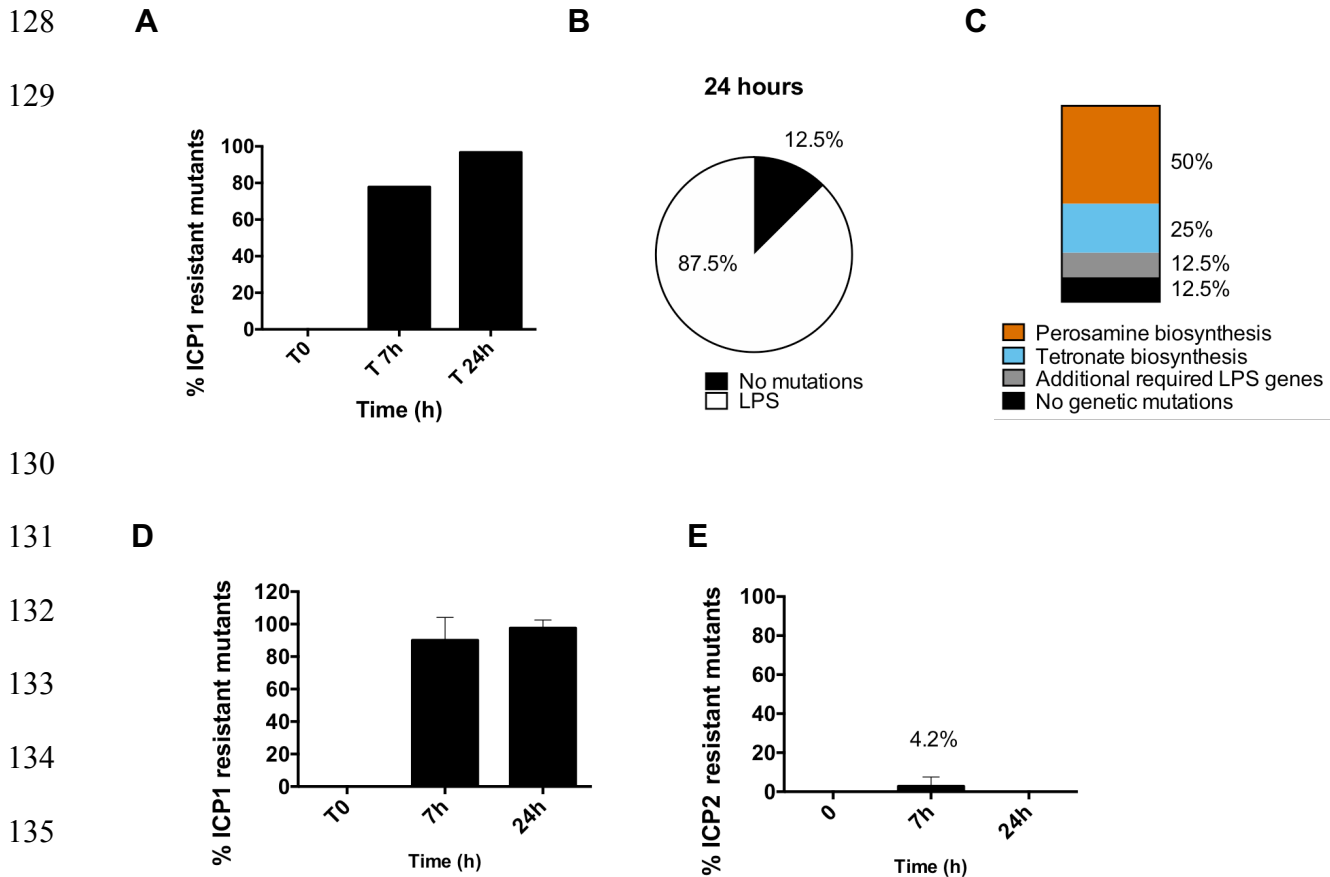

130

131 **D**

132

133

134

135

136

137

138 **Figure S4. Phage escape mutants carry genetic mutations linked to the phage**

139 **receptor.** Percentage of survivors resistant to ICP1 or ICP2 after predation in estuary

140 conditions or in the presence of 1% chitin. (a) Number of ICP1 resistant mutants over

141 time. (b) Genetic mutation linkage. (c) Detailed information of pathways where genetic

142 variations were found on ICP1 resistant mutants. (d) Number of ICP1 resistant mutants

143 over time in 1% chitin in estuary conditions. (d) Number of ICP2 resistant mutants over

144 time in 1% chitin in estuary conditions.

145

146

147 **A**

148

149

150

151

152

153

154

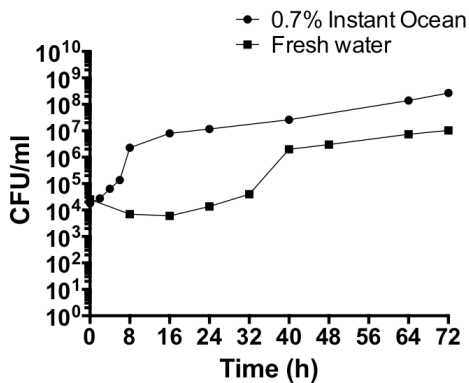

**B**

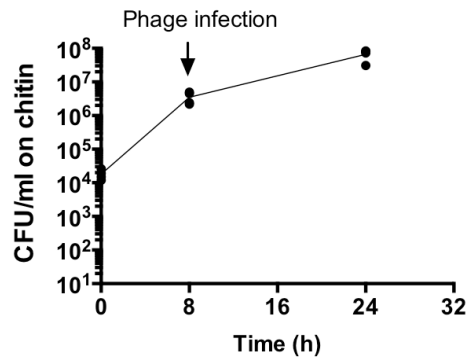

155 **Figure S5. *V. cholerae* grows in the presence of chitin in fresh water and estuary**

156 **environments.**  $10^4$  CFU of *V. cholerae* from an overnight culture were inoculated into a

157 (a) 1% chitin suspension in 0.7% Instant Ocean or autoclaved, filter-sterilized fresh

158 water. Cultures were incubated statically at 30°C and vigorously shaken before every

159 time point. Graph represents the average and standard error of at least three biological

160 replicates. (b) Bacterial numbers in 1% chitin on 0.7% Instant Ocean at 0, 8 and 24h in

161 1% chitin for phage predation assay.

162

163

164

165

166

167

168

169

Cecilia A. Silva-Valenzuela, Andrew Camilli



170  
171  
172  
173  
174  
175  
176  
177  
178  
179  
180  
181  
182  
183  
184  
185  
186  
187  
188  
189  
190  
191  
192

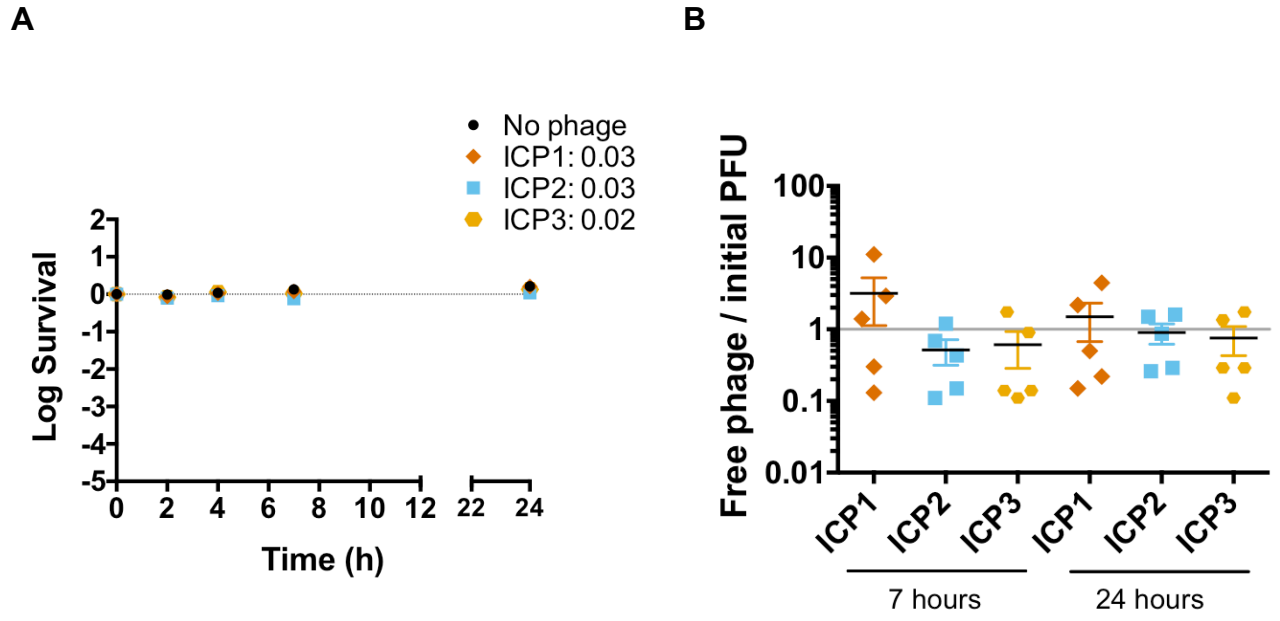

**Figure S6. Chitin availability does not aid phage predation in a nutrient-poor fresh water environment.**  $10^7$  CFU of *V. cholerae* from an overnight culture were pre-adapted in a 1% chitin suspension in autoclaved, filter-sterilized fresh water. The next day, phages ICP1, ICP2 or ICP3 were added to an MOI of 0.01 to assess bacterial viability and phage replication over time. Graph represents the average and standard error of at least four biological replicates. (a) Bacterial viability at 1, 2, 4, 7 and 24h in fresh water. (b) Phage replication at 7 and 24h in fresh water relative to number initially added. Grey line indicates initial phage added.

**Table S1: Genetic variations in ICP1 resistant survivors in planktonic 0.7% Instant Ocean at 24h post-infection**

| Isolate             | Reference Position    | Gene                        | Annotation                                            | Type      | Reference | Coverage | Frequency | Amino acid change          |
|---------------------|-----------------------|-----------------------------|-------------------------------------------------------|-----------|-----------|----------|-----------|----------------------------|
| ICP1 <sup>R</sup> 1 | 2663871               | <i>wbeL</i><br>(A track)    |                                                       | Deletion  | A         | 41       | 82.93     | WP_000117645.1:p.Thr39fs   |
| ICP1 <sup>R</sup> 2 | 2658706               | <i>manA</i><br>(A track)    | GDP-mannose 4,6-dehydratase                           | Deletion  | A         | 28       | 82.14     | WP_001036868.1:p.Thr127fs  |
| ICP1 <sup>R</sup> 3 | 2672896               | <i>wbeV</i>                 | Glycosyl transferase family 1 (RS112245)              | SNV       | A         | 42       | 100       | WP_000865953.1:p.Leu74Arg  |
| ICP1 <sup>R</sup> 4 | 2660080               | <i>wbeE</i>                 | aminotransferase DegT (RS12185) - Perosamine synthase | Insertion | -         | 26       | 65.38     | WP_000613529.1:p.Asn207fs  |
| ICP1 <sup>R</sup> 5 | 2657695               | <i>manB</i>                 | phosphomannomutase (RS12175)                          | SNV       | T         | 50       | 90        | WP_000661577.1:p.Asp252Glu |
| ICP1 <sup>R</sup> 6 | 2656372               | <i>manC</i>                 | mannose-1-phosphate guanyltransferase (RS12170)       | SNV       | G         | 74       | 100       | WP_001894734.1:p.Trp278Leu |
| ICP1 <sup>R</sup> 7 | No genetic variations |                             |                                                       |           |           |          |           |                            |
| ICP1 <sup>R</sup> 8 | 2664290               | <i>wbeL</i><br>(no A-track) |                                                       | SNV       | C         | 17       | 100       | WP_000117645.1:p.Pro176Leu |

204 **References**

- 205 1. Maloy SR (1990) *Experimental Techniques in Bacterial Genetics* (Jones and  
206 Bartlett).
